# Supplementary material for: Farmer and Veterinarian Attitudes towards the Bovine Tuberculosis Eradication Programme in Spain: What Is Going on in the Field?
Source: Front Vet Sci. 2017 Nov 27;4:202. doi: 10.3389/fvets.2017.00202 (PMC5712013; doi:10.3389/fvets.2017.00202)
Supplement: Supplementary file 1 [file data_sheet_1.pdf]

# Farmer and Veterinarian Attitudes towards the Bovine Tuberculosis Eradication Programme in Spain: What Is Going on in the Field?

Giovanna Ciaravino<sup>\*1</sup>, Patricia Ibarra<sup>2</sup>, Ester Casal<sup>3</sup>, Sergi Lopez<sup>3</sup>, Josep Espluga<sup>3</sup>, Jordi Casal<sup>1,4</sup>, Sebastian Napp<sup>4</sup>, Alberto Allepuz<sup>1,4</sup>

**\*Corresponding author:**

Giovanna Ciaravino

E-mail: [giovanna.ciaravino@uab.cat](mailto:giovanna.ciaravino@uab.cat)

## Supplementary material

### List of Abbreviation

$\gamma$ -IFN = Interferon- $\gamma$  assay

SIT = Single Intradermal Test

bTB = Bovine Tuberculosis

### A. Sentences from the qualitative in-depth interviews reported in their original language (i.e., Spanish or Catalan)

#### i) bTB detection and control

S1- “yo no tengo confianza en las pruebas, para mí es un poco de lotería”. (farmer)

S2- “...porque yo animal positivo no lo quiero tener ni de coña, aunque sea la mejor vaca, como el mejor toro, o sea, seguro que no lo quiero tener, porque no es más que un problema, pero quiero tener la certeza de que es positivo” (farmer)

S3- “[...] en otros países se hacían las dos cosas a la vez, el  $\gamma$ -IFN y la SIT, y si coincidían era positiva, bueno pues yo me quedaría más tranquilo si me hicieran algo de eso, aunque me cobraran algo más. [...]” (farmer)

S4- “tuve que matar ochenta y tantos animales, de los que no me decomisaron ni una sola pieza de nada y yo ya estaba cabreado” (farmer)

S5- “No es una prueba fiable, que si daba alguna en tuberculina, alguna no daba en el  $\gamma$ -IFN. Y alguna daba en el  $\gamma$ -IFN y en lo otro no, que era muy raro” (farmer)

S6- “A ver quién me dice a mí que muchas de mis explotaciones son de paratuberculosis y no de bTB. Nosotros no hacemos la comparada [...]” (private veterinarian)

S7- “[...] La SIT bueno, da buenos resultados pero con muchos condicionantes que te pueden afectar [...]” (official veterinarian)

S8- “[...] yo he ido al campo y me he encontrado en las charlas con algunos ganaderos de que faltaba rigor en la prueba. Pero no rigor por no quererlo hacer sino rigor por desconocimiento [...]” (official veterinarian)

S8b- “[...] Te encuentras explotaciones extensivas que tienen unas mangas estupendas y tienen unas instalaciones estupendas donde los veterinarios que trabajan en el campo pues están bien, son seguras, son prácticas, son cómodas y otros sitios que están regular. Eso sí que creo que es un punto en el cual la administración de alguna manera deberíamos meternos más, tanto por la ejecución de esto como por temas de prevención de riesgos laborales. . Más de uno se ha quedado en la manga, que o se ha caído... cosas que no ha pasado nada por ahora pero podrían pasar”. (official veterinarian)

- 45 S9- *“Claro al meter el tema del  $\gamma$ -IFN han aparecido no más sino lo que había [...]”* (official  
46 *veterinarian)*
- 47 S10- *“[...] y yo tengo duda con ella, el interferón me saca de dudas, ¿entiendes?”* (private  
48 *veterinarian)*
- 49 S11- *“[...] y el gamma, mejora la SIT en algún caso, lo mejora entre otras cosas en el tema de que*  
50 *el diagnóstico es en laboratorio, por lo tanto la presión en el campo desaparece.”* (official  
51 *veterinarian)*
- 52 S12- *“el interferón también es verdad que saca vacas que no son...Hombre, saca falsos positivos,*  
53 *sí...No sé por qué. Eso los del laboratorio sabrán...”* (private veterinarian)
- 54 S13- *“y con esa ( $\gamma$ -IFN) hay gente que quiere que se la haga pero el problema es ese, no hay*  
55 *perras. Y el laboratorio la mitad de las veces no tiene posibilidad de hacerlas”.* (farmer)
- 56 S14- *“El  $\gamma$ -IFN, yo personalmente le pegaba fuego. Aunque es una herramienta válida pero es*  
57 *cara, al ser cara depende de los presupuestos y una campaña de saneamiento continua no*  
58 *puede depender de que ahora tengo dinero, y mañana sí y mañana no [...] Y esto no puede*  
59 *ser. Entonces, y esto ya lo he dicho más de una vez, mejor que el dineral tan grandísimo que*  
60 *cuesta los kits de  $\gamma$ -IFN lo invirtiésemos en más personal [...]”* (official veterinarian)
- 61 S15- *“tantos problemas porque tienes que llevarlo al laboratorio que nosotros, incluso yo le digo a*  
62 *tus compañeros, nos pusieron un límite de entregar la sangre, y aquí hay como poco hasta*  
63 *100 km hasta laboratorio y no nos esperaban”* (private veterinarian)
- 64 S16- *“cuando todo el mundo saneamos al mismo tiempo, llega mucha sangre al laboratorio y ese*  
65 *laboratorio incluso..., a nosotros nos ha llegado a tardar 28 días en sacar los resultados, de*  
66 *publicarlos o meterlos en la base de datos”.* (farmer)
- 67 S17- *“[...] Mandamos partidas a matadero que no se muestrean, porque hay varios mataderos y no*  
68 *tiene personal para cubrir todos los días que se matan en todos los mataderos.”* (official  
69 *veterinarian)*
- 70 S18- *“...vamos a una finca, vamos a cargar animales, y vamos a la finca y nos dicen “No, no están,*  
71 *están allí”. Están en la finca de un vecino porque tiene mejores corrales para cargar que está*  
72 *calificado sanitariamente que es T3, sin embargo el que está cargando allí es positivo y está*  
73 *cargando en los corrales de otro que es negativo. Eso te enteras si vas a la finca, si no, no te*  
74 *enteras”* (official veterinarian)
- 75 S19- *“Hay otra cosa que no me acaban de aclarar y no lo acabo de entender porque yo creo que*  
76 *nadie lo sabe tampoco, a no ser que viniera un inmunólogo y nos lo explicara de puta madre*  
77 *[...] deben ser reacciones esas a algún Mycobacterium, algo raro”* (private veterinarian)
- 78 S20- *“ese caso se expuso allí el día de la reunión, y tanto ni veterinarios ni como ganaderos ni*  
79 *técnicos, ninguno sabía darle una explicación.”* (farmer)
- 80 S21- *“[...] tendrían que investigar más y cambiar el sistema para atacar la enfermedad, porque*  
81 *vamos yo para mí está demostrado que se han matado muchos animales y que no se ha*  
82 *conseguido nada, entonces habría que cambiarlo, digo yo”* (farmer)
- 83 S22- *“A nosotros nos está haciendo controles gente menos preparada que nosotros. Es que por eso*  
84 *se quejaban algunos compañeros, que han puesto un recurso de que no le hagan controles,*  
85 *que el que vaya que esté más preparado que él”.* (private veterinarian)
- 86 S23- *“Hombre, si va a calificar y no da ninguna positiva, [...], le estás jodiendo la calificación que*  
87 *le hace falta para poder vender. Entonces es absurdo, pues antes las repetíamos”.* (private  
88 *veterinarian)*
- 89 S24- *“Yo lo que pediría de alguna manera es que se coordinara lo que es el saneamiento con los*  
90 *demás controles, para que una vez que tú tengas el ganado recogido y dispuesto a pasar por*  
91 *la manga, se hiciera todo de una vez, que no haya que estar trastornando a los animales*

- 92 *tantas veces que algunas veces a nosotros nos hace falta aquí a la mujer, los niños, mi primo,*  
 93 *el otro, la mujer del otro... ”. (farmer)*
- 94 S25- *“En cuello se hace, pero en ganado bravo, ponerte a hacerlo en cuello..., muchas veces te*  
 95 *estás jugando el propio físico, en meter la mano hay en la mangada para pelarle el cuello,*  
 96 *medir, pinchar... Eso es complicado. Porque el cuello es un parte de bastante movilidad*  
 97 *animal” (farmer)*
- 98 S26- *“no puedes proteger a unos ganaderos así y a otros no. [...] en este tema yo creo que están*  
 99 *perjudicándolos más que beneficiándolos. (private veterinarian)*
- 100 S27- *“habría que aplicarles a todo el mundo lo mismo, lo veo así de claro. Todo lo demás yo pienso*  
 101 *que es esconder el problema” (official veterinarian).*
- 102 S28- *“[...] no sé, a lo mejor es lógico que..., también si los pasas por una mangada se te puede*  
 103 *fastidiar un cuerno, de un animal de esos que valen... ” (farmer)*
- 104 S29- *“Hay quien dice que el animal cuanto menos se toque mejor, porque está más en libertad, más*  
 105 *salvaje.”(farmer)*
- 106 S30- *“Claro, sí se aprovechan, cuando van a matadero sucio se aprovechan pero bueno hubiera*  
 107 *sido un mal menor, pero el problema gordo es tenerles que dar a los animales comida*  
 108 *durante un montón de tiempo... ” (farmer)*

109

## 110 **ii) Training, information and communication**

111

- 112 S31 - *“[...] en la bTB hemos ido saliendo de la universidad y han dicho echarse al campo y nos ha*  
 113 *ido enseñando un compañero y como nos ha enseñado el compañero y han ido haciendo la*  
 114 *prueba y dando un diagnóstico. [...] en el curso me he dado cuenta de que eran conceptos de*  
 115 *partida que no era ni porque ellos querían hacerlo peor sino que lo habían aprendido así y*  
 116 *no habían visto la reacción de bTB claramente” (official veterinarian)*
- 117 S32- *“[...] Yo ahora mismo estaría por hacer lo mismo que se ha hecho con el tema de los*  
 118 *veterinarios a nivel de ganaderos.” (private veterinarian)*
- 119 S33- *“[...] la trasmisión de la información y la implicación de los ganaderos. Yo creo que eso es*  
 120 *fundamental, y cosas que estamos ahí flojeando. Oye mira esto es así, así y explicárselo a*  
 121 *todo el mundo” (official veterinarian)*
- 122 S34- *“[...] Es que no tiene mucho sentido que te digan que esto es muy importante y después no te*  
 123 *expliquen cómo funciona, ¿entonces cómo podemos combatirlo? ¿No?” (farmer)*
- 124 S35- *“[...] yo mi percepción, igual estoy equivocado, pero mi percepción es que esto se debe a*  
 125 *cuestiones políticas, es decir, por intereses políticos europeos, interesa reducir la cabaña*  
 126 *bovina en España y están siendo muy duros con esta enfermedad para reducir la cabaña*  
 127 *bovina, porque si no pondrían..., si realmente fuera un problema pues investigarían más,*  
 128 *pondrían más medios, lo harían de manera igualmente estricta con bovino y con otras*  
 129 *especies” (farmer) [...] (farmer)*
- 130 S36- *“Que no creo que sea sólo cuestión de cursos, que últimamente hemos visto que venga curso*  
 131 *para esto, curso para lo otro, y están los pobres aburridos, que si curso de bienestar animal*  
 132 *en el transporte, bienestar animal en la explotación, usos de biocidas en la higiene*  
 133 *veterinaria,... ” (private veterinarian)*
- 134 S37- *“Es muy difícil porque ellos tienen otras preocupaciones que no es la de la sanidad. La*  
 135 *sanidad el ganadero no es consciente realmente de la importancia directa e indirecta que*  
 136 *pueda tener [...] ”. (private veterinarian)*
- 137 S38- *“Los veterinarios de la ADSG informan a todo el mundo, ya que él quiera o no quiera, eso...*  
 138 *Pero informar, informan” (farmer)*

- 139 S39- “[...] A part del que es puguin explicar als bars no existeixen espais de trobada pels  
140 ramaders” (private veterinarian)
- 141 S40- “[...] Si hi ha canvis a les lleis o alguna cosa ningú els hi explica. Potser els explica un altre  
142 en un bar.” (farmer)
- 143 S41- “[...] A l’ADS si que et pots informar. Hi ha l’assemblea anual on s’explica tot” (farmer)
- 144 S42- “[...] “La comunicació de les proves als ramaders es bona. Segons quins ramaders se’ls hi  
145 reenvia directament el correu amb els resultats. Quan arriben es truca al ramader i se’l  
146 informa” (official veterinarian)
- 147 S43- “[...] “La comunicació dels resultats de les proves és ràpida. Les primeres són in situ i la  
148 gama interferó és bastant ràpida, entre dos i quatre dies.” (farmer)
- 149 S44- “[...] “...cuando no nos querían dar los resultados porque como éramos delincuentes. Era el  
150 único sitio donde no nos daban los resultados. Porque en teoría sólo marcábamos lo que  
151 marcaba el gamma.” (private veterinarian)
- 152 S45- “[...] Pero si lo fastidioso es que no ves resultados. Entonces la gente está cabreada con eso”.  
153 (farmer)
- 154 S46- “[...] a veces yo creo que tampoco se recogen las muestras como debe ser, luego no se  
155 notifica si ha dado el cultivo positivo” (private veterinarian)
- 156

### 157 **iii) Role of wildlife and other domestic reservoirs**

158

- 159 S47- “[...] nosotros hemos transmitido primero a la fauna silvestre los espilogotipos de la fauna  
160 doméstica y la fauna silvestre nos lo está devolviendo contaminándolos.” (official  
161 veterinarian)
- 162 S48- “Yo lo veo complicadillo eso, porque mientras que no se termine con la fauna salvaje... ¿cómo  
163 vas a quitar eso? Tema de venado, tema de jabalíes [...] la prueba está que en lo que es  
164 vacuno intensivo que no salen de una explotación, que te voy a decir yo, no llega al 2%...”  
165 (farmer)
- 166 S49- “Con respecto a la fauna salvaje, es muy complicado, porque no puedes..., los animales bueno  
167 se contagian por la hierba, por la saliva, por el agua en donde beben..., [...] decían que  
168 habían inventado un bebedero para que pudieran beber las vacas y no pudieran beber los  
169 ciervos, pero al final eso dicen que tampoco ha resultado efectivo” (farmer)
- 170 S50- “cuando terminan, se dan la mano, empiezan a salir por la finca coches y se van extendiendo a  
171 todos lados. Y a este señor nadie le ha exigido que aquí a la salida haya un vado sanitario  
172 que desinfecte los carros, las ruedas. Estos señores que hoy están aquí a lo mejor en la  
173 comarca, mañana van a Córdoba y el viernes a Cádiz, y los perros van de aquí a aquí”  
174 (official veterinarian)
- 175 S51- “Que si una persona tiene dentro de una malla 600 ciervos, no digo que no los tenga, pero que  
176 los tenga con el mismo cuidado que la ganadería. Que les haga el saneamiento, porque  
177 medios para cogerlos hay”. (private veterinarian)
- 178 S52- “[...] eso no se controla y se trata en muchos aspectos como la ganadería normal, o sea, se le  
179 da de comer como a la ganadería normal, acuden a comer como la ganadería normal, se toca  
180 el pito con el coche y se acostumbren los animales a ir a comer” (farmer)
- 181 S53- “[...] Explotaciones en las que el ganadero tiene parte de coto de caza... y puedes dedicarla a  
182 la actividad cinegética y además es perfectamente comprensible. Lo que pasa es que habrá  
183 que ordenar de alguna manera todo esto, ordenarlo y que empiecen a aparecer las ideas  
184 oportunas para que esto pueda minimizar las consecuencias que tiene.” (official veterinarian)
- 185

186 **iv) Risk perception on social aspects**

187

188 S54- “un ganadero muy problemático que no lo hago yo, lo hace otro y está rodeado por todos los  
189 míos. Cayeron todos, y él seguía limpio, hasta que fue una vez la policía judicial y salieron  
190 positivas.” (private veterinarian)

191 S55- “[...] Pero verás que yo lo puedo pensar como lo puede pensar muchísimos ganaderos,  
192 camiones, coches, personas..., que si está ahí a 20 km puede estar mañana aquí, ¿no?”  
193 (farmer)

194 S56- “Et ve a fer la prova el teu veterinary habilitat i per tant hi tens molta relació del dia a dia i  
195 colabora i ajuda en tot el possible” (farmer)

196 S57- “[...] Luego al final ¿qué pasa?, que encadenas, por no perder al cliente..., pues lo haces. Y  
197 así empezó y claro ya no era uno, ya eran varios. Y al final pues algunos nos hemos resistido  
198 y yo he perdido muchísimos clientes de bovino” (private veterinarian)

199 S58- “[...] los ganaderos siempre se han quejado. Algunos decían por aquí que yo tenía un rifle en  
200 vez de una jeringa” (private veterinarian).

201 S59- “A vegades els ramaders busquen algun culpable. Per què han sortit positius? Ells mai tenen  
202 la culpa diuen, ..., quan hi ha positius la relació a vegades es tensa i es trencadirectament”.  
203 (private veterinarian)

204 S60- “...para pasar a T3 esté presente la administración, a ellos les quita un montón de  
205 problemas” (official veterinarian)

206 S61- “La relació entre veterinaris de ADS i oficials és bona. Sempre hi ha persones amb qui no et  
207 portes tant bé però en general és bona” (private veterinarian)

208 S62- “Cap problema amb l'administració. Sempre que ha tingut algun problema ho ha comunicat a  
209 l'administració, al Departament i l'han atès bé, ha sortit content i si ells ho han pogut  
210 soventar ho han fet” (farmer)

211 S63- “...el problema es que sí, que por uno, dos o tres que hagan mal o unos cuantos ganaderos,  
212 estamos pagando todos” (private veterinarian)

213 S64- “[...] la actitud con la que nos tratan a los ganaderos, en principio nos tratan como si  
214 fuéramos delincuentes” (farmer)

215 S65- “[...] Yo sé de gente que ha saneado y ha llamado por teléfono y “Eh, ¿tienes alguna  
216 hinchada?”. “No”. Eso no puede ser. [...]” (private veterinarian)

217 S66- “[...] Yo tengo bastante sospecha de que algunas vacas se han leído desde el coche, vamos,  
218 que lo dice mucha gente, yo se lo he oído a algún ganadero. Lo hace desde el coche y ¿cómo  
219 ves tú que aquello se ha hinchado o no? [...]” (farmer)

220 S67- “[...] Ese tipo de cosas pues te descorazonan y que hay gente que no hacen las cosas y en  
221 estos años terminas enterándote de muchas cosas que han pasado y de gente que les han...,  
222 de cosas que no se hacen bien” (farmer)

223 S68- “[...] y además a todo el mundo por igual, y eso la verdad es que me duele bastante, porque  
224 en definitiva esta profesión me parece una profesión bastante digna porque lo que hacemos  
225 es producir alimentos para la sociedad y hay que producirlos con calidad, claro.” (farmer)

226

227 **v) Risk perception on bTB and benefits of eradication;**

228

229 S69- “[...] estamos en un sector, primero muy estratégico y segundo muy miedoso, porque al final  
230 la alimentación, lo que las personas nos llevamos a la boca, en el momento en que tienen el  
231 más mínimo riesgo no quieren saber nada y simplemente la percepción aunque no sea real,  
232 genera unas pérdidas importantísimas” (official veterinarian)

- 233 S70- “[...] Hombre, nosotros los veterinarios lo vemos claro, ¿no? El tema de erradicar es un tema  
234 de salud pública y de sanidad animal, tienes que acabar con enfermedades más peligrosas y  
235 la TB es una de ellas, tenemos que quitarla de en medio a parte por interferencia del  
236 mercado, por tema de salud pública, por tema de la propia sanidad animal”. (official  
237 veterinarian)
- 238 S71- “[...] ¿Qué estamos en una enfermedad que hay que erradicar por supuesto, pero que sin  
239 embargo sirve para el consumo humano?” (farmer)
- 240 S72- “Si et fan sacrificar 100 animals i 99 van a la cadena humana dius...els han matat perquè han  
241 volguts que els matem” (farmer)
- 242 S73- “[...] “Eso nunca ha afectado a la producción. Date cuenta que eso se consume por consumo  
243 humano, y eso, para mí eso es una cosa que eso cuando se consume no era malo, pero claro  
244 que los veterinarios sabrán por lo que será. [...]” (farmer)
- 245 S74- “[...] Yo no sé exactamente cuál es lo que te puede contagiar, a las personas, porque yo creo  
246 que es nada. [...] creo que hay un montón de cosas mucho más graves que eso y sin embargo  
247 no se les está dando ninguna importancia”. (farmer)
- 248 S75- “[...] beneficios si hay porque estar libre de una enfermedad siempre es beneficioso [...] las  
249 vacas no te van a parir bien si están enfermas, con los becerros exactamente igual”. (farmer)
- 250 S76- “[...] yo he tenido animales allí que eran claramente positivos, bueno positivos no, claramente  
251 con la enfermedad, y eran animales que tú no podías explotarlos”. (farmer)
- 252 S77- “[...] Como realizamos la prueba todo los años, actualmente no tenemos animales realmente  
253 enfermos de TBb, lo que tenemos son animales que han estado en contacto con la TBb, no  
254 han desarrollado ningún tipo de enfermedad pero como han estado en contacto con la TBb  
255 cuando le hacemos la prueba los detectamos como TBb y los sacrificamos, pero el animal  
256 desde el punto de vista reproductivo es totalmente rentable.” (official veterinarian)
- 257 S78- “[...] “Ellos ven que las dejan circular y nada más, hombre y que está el ganado sano. Pero  
258 ellos no ven que eso sea..., es una cosa impuesta y es una cosa que hay que hacer” (private  
259 veterinarian)
- 260 S79- “[...] Aquí el tema sanitario se lleva un poquito por obligación no porque haya una  
261 conciencia... [...]” (farmer)
- 262 S80- “yo creo que ahí no puede haber duda ninguna de que la erradicación tiene que ser sí o sí,  
263 eso es inevitable, porque ya sabemos lo que nos encontramos cuando nos cierran las  
264 fronteras...” (farmer)
- 265 S81- “[...] tú dime a mí qué hacemos si salen focos, ¿cómo vendes la leche?, ¿cómo vendes la  
266 carne? Que los más interesados de que esto no pase, son los ganaderos, aunque son los que  
267 más que pierden. [...]” (farmer)
- 268 S82- “[...] realmente se lo pagamos como un animal enfermo. Ese hecho, pero claro aquí el  
269 problema es que si tú de alguna manera subes la indemnizaciones estás primando la  
270 enfermedad” (official veterinarian)
- 271 S83- “[...] La indemnización te daban, no para comprar una vaca, pero no se perdía tanto, entre la  
272 carne y la indemnización pues podías comprar una becerro, pero claro había que sanear. Yo  
273 lo veía bien y lo sigo viendo bien”. (farmer)
- 274
- 275 **vi) Future perspective and proposed changes to the programme.**
- 276
- 277 S84- “[...] Erradicar, erradicar, va a ser muy difícil. Pero bajar la prevalencia, sí. Si se implican  
278 todos los sectores y se ponen en serio, no ahora sí, ahora no, ahora cambio la legislación  
279 porque nos convenga.” (private veterinarian)

280 S85- “[...] pero ¿por qué no sacan la vacuna de la TB? ¿Sabes que la hay en humanos? ¿Lo  
281 sabías? ¿Te imaginas? Resulta que estamos metidos en un pozo cargándonos cabezas de  
282 ganaderos para una cosa que se va a solucionar dentro de 15 o 20 años, sin dar un duro, si  
283 se pusieran a poner un duro en 5 años habría un vacuna, ya la hay ¿eh?, de humanos, ¿por  
284 qué no la sacan para bóvidos? Se acabó el problema...” (farmer)

285 S86- “[...] Es que estamos viendo la enfermedad como si fuéramos a morirnos al día siguiente  
286 como si fueran manzanas envenenadas y a lo mejor hay que admitir que no vamos a superar  
287 este problema en poco tiempo, pero no tenemos que cargarnos al ganadero por en medio”  
288 (farmer)
